# Supplementary material for: The Potential of Co-Evolution and Interactions of Gut Bacteria–Phages in Bamboo-Eating Pandas: Insights from Dietary Preference-Based Metagenomic Analysis
Source: MDPI journal article supplement (doi:10.3390/microorganisms12040713), 2024-03-31
Supplement: s1 [file s1]

# Supporting information

**Table S1 Information on the macrogenomic samples used in this study.**

| Sample ID | Group | Dietary preference | Publication time | Citation            |
|-----------|-------|--------------------|------------------|---------------------|
| CA_1      | CA    | Carnivores         | 2018             | (Zhu et al., 2018a) |
| CA_2      | CA    | Carnivores         | 2018             | (Zhu et al., 2018a) |
| CA_3      | CA    | Carnivores         | 2018             | (Zhu et al., 2018a) |
| CA_4      | CA    | Carnivores         | 2018             | (Zhu et al., 2018a) |
| CA_5      | CA    | Carnivores         | 2018             | (Zhu et al., 2018a) |
| CA_6      | CA    | Carnivores         | 2018             | (Zhu et al., 2018a) |
| CA_7      | CA    | Carnivores         | 2018             | (Zhu et al., 2018a) |
| CA_8      | CA    | Carnivores         | 2018             | (Zhu et al., 2018a) |
| CA_9      | CA    | Carnivores         | 2018             | (Zhu et al., 2018a) |
| CA_10     | CA    | Carnivores         | 2018             | (Zhu et al., 2018a) |
| CA_11     | CA    | Carnivores         | 2018             | (Zhu et al., 2018a) |
| CA_12     | CA    | Carnivores         | 2018             | (Zhu et al., 2018a) |
| CA_13     | CA    | Carnivores         | 2018             | (Zhu et al., 2018a) |
| CA_14     | CA    | Carnivores         | 2018             | (Zhu et al., 2018a) |
| CA_15     | CA    | Carnivores         | 2018             | (Zhu et al., 2018a) |
| CA_16     | CA    | Carnivores         | 2018             | (Zhu et al., 2018a) |
| CA_17     | CA    | Carnivores         | 2018             | (Zhu et al., 2018a) |
| CA_18     | CA    | Carnivores         | 2018             | (Zhu et al., 2018a) |
| CA_19     | CA    | Carnivores         | 2018             | (Zhu et al., 2018a) |
| HE_1      | HE    | Herbivores         | 2018             | (Zhu et al., 2018a) |
| HE_2      | HE    | Herbivores         | 2018             | (Zhu et al., 2018a) |
| HE_3      | HE    | Herbivores         | 2018             | (Zhu et al., 2018a) |
| HE_4      | HE    | Herbivores         | 2018             | (Zhu et al., 2018a) |
| HE_5      | HE    | Herbivores         | 2018             | (Zhu et al., 2018a) |
| HE_6      | HE    | Herbivores         | 2018             | (Zhu et al., 2018a) |
| HE_7      | HE    | Herbivores         | 2018             | (Zhu et al., 2018a) |
| HE_8      | HE    | Herbivores         | 2018             | (Zhu et al., 2018a) |
| HE_9      | HE    | Herbivores         | 2018             | (Zhu et al., 2018a) |
| HE_10     | HE    | Herbivores         | 2018             | (Zhu et al., 2018a) |
| HE_11     | HE    | Herbivores         | 2018             | (Zhu et al., 2018a) |
| HE_12     | HE    | Herbivores         | 2018             | (Zhu et al., 2018a) |
| OC_1      | OC    | Omnivorous         | 2018             | (Zhu et al., 2018a) |
| OC_2      | OC    | Omnivorous         | 2018             | (Zhu et al., 2018a) |
| OC_3      | OC    | Omnivorous         | 2018             | (Zhu et al., 2018a) |
| OC_5      | OC    | Omnivorous         | 2018             | (Zhu et al., 2018a) |
| OC_6      | OC    | Omnivorous         | 2018             | (Zhu et al., 2018a) |
| OC_7      | OC    | Omnivorous         | 2018             | (Zhu et al., 2018a) |

|            |       |                            |      |                      |
|------------|-------|----------------------------|------|----------------------|
| OC_8       | OC    | Omnivorous                 | 2018 | (Zhu et al., 2018a)  |
| OC_9       | OC    | Omnivorous                 | 2018 | (Zhu et al., 2018a)  |
| OC_10      | OC    | Omnivorous                 | 2018 | (Zhu et al., 2018a)  |
| OC_11      | OC    | Omnivorous                 | 2018 | (Zhu et al., 2018a)  |
| Chengdu_1  | GPCD  | Bamboo-eating giant pandas | 2018 | (Zhang et al., 2018) |
| Chengdu_2  | GPCD  | Bamboo-eating giant pandas | 2018 | (Zhang et al., 2018) |
| Chengdu_3  | GPCD  | Bamboo-eating giant pandas | 2018 | (Zhang et al., 2018) |
| Chengdu_4  | GPCD  | Bamboo-eating giant pandas | 2018 | (Zhang et al., 2018) |
| Chengdu_5  | GPCD  | Bamboo-eating giant pandas | 2018 | (Zhang et al., 2018) |
| Chengdu_6  | GPCD  | Bamboo-eating giant pandas | 2018 | (Zhang et al., 2018) |
| Chengdu_7  | GPCD  | Bamboo-eating giant pandas | 2018 | (Zhang et al., 2018) |
| Yaan_1     | GPYA  | Bamboo-eating giant pandas | 2019 | (Guo et al., 2019)   |
| Yaan_2     | GPYA  | Bamboo-eating giant pandas | 2019 | (Guo et al., 2019)   |
| Yaan_3     | GPYA  | Bamboo-eating giant pandas | 2019 | (Guo et al., 2019)   |
| Yaan_4     | GPYA  | Bamboo-eating giant pandas | 2019 | (Guo et al., 2019)   |
| Yaan_5     | GPYA  | Bamboo-eating giant pandas | 2019 | (Guo et al., 2019)   |
| Yaan_6     | GPYA  | Bamboo-eating giant pandas | 2019 | (Guo et al., 2019)   |
| Yaan_7     | GPYA  | Bamboo-eating giant pandas | 2019 | (Guo et al., 2019)   |
| Yaan_8     | GPYA  | Bamboo-eating giant pandas | 2019 | (Guo et al., 2019)   |
| Yaan_9     | GPYA  | Bamboo-eating giant pandas | 2019 | (Guo et al., 2019)   |
| Yaan_10    | GPYA  | Bamboo-eating giant pandas | 2019 | (Guo et al., 2019)   |
| Qinling_1  | GPQIN | Bamboo-eating giant pandas | 2017 | (Wu et al., 2017)    |
| Qinling_3  | GPQIN | Bamboo-eating giant pandas | 2017 | (Wu et al., 2017)    |
| Qinling_4  | GPQIN | Bamboo-eating giant pandas | 2017 | (Wu et al., 2017)    |
| Qinling_5  | GPQIN | Bamboo-eating giant pandas | 2017 | (Wu et al., 2017)    |
| Qinling_6  | GPQIN | Bamboo-eating giant pandas | 2017 | (Wu et al., 2017)    |
| Qinling_7  | GPQIN | Bamboo-eating giant pandas | 2017 | (Wu et al., 2017)    |
| Qinling_8  | GPQIN | Bamboo-eating giant pandas | 2017 | (Wu et al., 2017)    |
| Qinling_9  | GPQIN | Bamboo-eating giant pandas | 2017 | (Wu et al., 2017)    |
| Qinling_10 | GPQIN | Bamboo-eating giant pandas | 2017 | (Wu et al., 2017)    |
| Qionglai_1 | GPQIO | Bamboo-eating giant pandas | 2019 | (Guo et al., 2019)   |
| Qionglai_2 | GPQIO | Bamboo-eating giant pandas | 2019 | (Guo et al., 2019)   |
| Qionglai_3 | GPQIO | Bamboo-eating giant pandas | 2019 | (Guo et al., 2019)   |
| Qionglai_4 | GPQIO | Bamboo-eating giant pandas | 2019 | (Guo et al., 2019)   |
| Qionglai_5 | GPQIO | Bamboo-eating giant pandas | 2019 | (Guo et al., 2019)   |
| Qionglai_6 | GPQIO | Bamboo-eating giant pandas | 2019 | (Guo et al., 2019)   |
| Qionglai_7 | GPQIO | Bamboo-eating giant pandas | 2019 | (Guo et al., 2019)   |
| XXL_1      | GPXXL | Bamboo-eating giant pandas | 2018 | (Zhu et al., 2018b)  |
| XXL_2      | GPXXL | Bamboo-eating giant pandas | 2018 | (Zhu et al., 2018b)  |
| XXL_3      | GPXXL | Bamboo-eating giant pandas | 2018 | (Zhu et al., 2018b)  |
| XXL_4      | GPXXL | Bamboo-eating giant pandas | 2018 | (Zhu et al., 2018b)  |
| XXL_5      | GPXXL | Bamboo-eating giant pandas | 2018 | (Zhu et al., 2018b)  |
| XXL_6      | GPXXL | Bamboo-eating giant pandas | 2018 | (Zhu et al., 2018b)  |
| XXL_7      | GPXXL | Bamboo-eating giant pandas | 2018 | (Zhu et al., 2018b)  |



|         |       |                            |      |                     |
|---------|-------|----------------------------|------|---------------------|
| XXL_8   | GPXXL | Bamboo-eating giant pandas | 2018 | (Zhu et al., 2018b) |
| XXL_9   | GPXXL | Bamboo-eating giant pandas | 2018 | (Zhu et al., 2018b) |
| XXL_10  | GPXXL | Bamboo-eating giant pandas | 2018 | (Zhu et al., 2018b) |
| XXL_11  | GPXXL | Bamboo-eating giant pandas | 2018 | (Zhu et al., 2018b) |
| XXL_12  | GPXXL | Bamboo-eating giant pandas | 2018 | (Zhu et al., 2018b) |
| XXL_13  | GPXXL | Bamboo-eating giant pandas | 2018 | (Zhu et al., 2018b) |
| XXL_14  | GPXXL | Bamboo-eating giant pandas | 2018 | (Zhu et al., 2018b) |
| XXL_15  | GPXXL | Bamboo-eating giant pandas | 2018 | (Zhu et al., 2018b) |
| XXL_16  | GPXXL | Bamboo-eating giant pandas | 2018 | (Zhu et al., 2018b) |
| XXL_17  | GPXXL | Bamboo-eating giant pandas | 2018 | (Zhu et al., 2018b) |
| XXL_18  | GPXXL | Bamboo-eating giant pandas | 2018 | (Zhu et al., 2018b) |
| XXL_19  | GPXXL | Bamboo-eating giant pandas | 2018 | (Zhu et al., 2018b) |
| RPxxl_1 | RP    | Bamboo-eating red pandas   | 2018 | (Zhu et al., 2018b) |
| RPxxl_2 | RP    | Bamboo-eating red pandas   | 2018 | (Zhu et al., 2018b) |
| RPxxl_3 | RP    | Bamboo-eating red pandas   | 2018 | (Zhu et al., 2018b) |
| RPxxl_4 | RP    | Bamboo-eating red pandas   | 2018 | (Zhu et al., 2018b) |
| RPxxl_5 | RP    | Bamboo-eating red pandas   | 2018 | (Zhu et al., 2018b) |
| RPxxl_6 | RP    | Bamboo-eating red pandas   | 2018 | (Zhu et al., 2018b) |

---

**Table S2 Information on the species and their groupings used in this study.**

| Species                 | Scientific name                  | Order          | Family          | Group |
|-------------------------|----------------------------------|----------------|-----------------|-------|
| Giant panda             | <i>Ailuropoda melanoleuca</i>    | Carnivora      | Ursidae         | GP    |
| Red panda               | <i>Ailurus fulgens</i>           | Carnivora      | Ailuridae       | RP    |
| Maned wolf              | <i>Chrysocyon brachyurus</i>     | Carnivora      | Canidae         | CA    |
| Arctic fox              | <i>Vulpes lagopus</i>            | Carnivora      | Canidae         | CA    |
| Silver fox              | <i>Vulpes vulpes</i>             | Carnivora      | Canidae         | CA    |
| Corsac fox              | <i>Vulpes corsac</i>             | Carnivora      | Canidae         | CA    |
| Red fox                 | <i>Vulpes vulpes</i>             | Carnivora      | Canidae         | CA    |
| Dhole                   | <i>Cuon alpinus</i>              | Carnivora      | Canidae         | CA    |
| Black-backed jackal     | <i>Canis mesomelas</i>           | Carnivora      | Canidae         | CA    |
| Siberian tiger          | <i>Panthera tigris altaica</i>   | Carnivora      | Felidae         | CA    |
| Bengal tiger            | <i>Panthera tigris tigris</i>    | Carnivora      | Felidae         | CA    |
| Lion                    | <i>Panthera leo</i>              | Carnivora      | Felidae         | CA    |
| Black leopard           | <i>Panthera pardus</i>           | Carnivora      | Felidae         | CA    |
| Indochinese leopard     | <i>Panthera pardus delacouri</i> | Carnivora      | Felidae         | CA    |
| Jaguar                  | <i>Panthera onca</i>             | Carnivora      | Felidae         | CA    |
| Cheetah                 | <i>Acinonyx jubatus</i>          | Carnivora      | Felidae         | CA    |
| Caracal                 | <i>Caracal caracal</i>           | Carnivora      | Felidae         | CA    |
| Striped hyena           | <i>Hyaena hyaena</i>             | Carnivora      | Hyaenidae       | CA    |
| Spotted hyena           | <i>Crocuta crocuta</i>           | Carnivora      | Hyaenidae       | CA    |
| Spotted seal            | <i>Phoca largha</i>              | Carnivora      | Phocidae        | CA    |
| Sun bear                | <i>Helarctos malayanus</i>       | Carnivora      | Ursidae         | OC    |
| Brown bear              | <i>Ursus arctos</i>              | Carnivora      | Ursidae         | OC    |
| Asian black bear        | <i>Ursus thibetanus</i>          | Carnivora      | Ursidae         | OC    |
| Kinkajou                | <i>Potos flavus</i>              | Carnivora      | Procyonidae     | OC    |
| Raccoon                 | <i>Procyon lotor</i>             | Carnivora      | Procyonidae     | OC    |
| Hog badger              | <i>Arctonyx collaris</i>         | Carnivora      | Mustelidae      | OC    |
| Père David's deer       | <i>Elaphurus davidianus</i>      | Artiodactyla   | Cervidae        | HE    |
| Hairy-fronted muntjac   | <i>Muntiacus crinifrons</i>      | Artiodactyla   | Cervidae        | HE    |
| Red deer                | <i>Cervus elaphus</i>            | Artiodactyla   | Cervidae        | HE    |
| Sika deer               | <i>Cervus nippon</i>             | Artiodactyla   | Cervidae        | HE    |
| Argali                  | <i>Ovis ammon</i>                | Artiodactyla   | Bovidae         | HE    |
| Goitered gazelle        | <i>Gazella subgutturosa</i>      | Artiodactyla   | Bovidae         | HE    |
| Takin                   | <i>Budorcas taxicolor</i>        | Artiodactyla   | Bovidae         | HE    |
| Onager                  | <i>Equus hemionus</i>            | Perissodactyla | Equidae         | HE    |
| Hoolock gibbon          | <i>Hoolock spp.</i>              | Primates       | Hylobatidae     | HE    |
| White-cheeked gibbon    | <i>Nomascus leucogenys</i>       | Primates       | Hylobatidae     | HE    |
| Black snub-nosed monkey | <i>Rhinopithecus bieti</i>       | Primates       | Cercopithecidae | HE    |
| François's Langur       | <i>Trachypithecus francoisi</i>  | Primates       | Cercopithecidae | HE    |

**Table S3 Information on the compositions and relative abundances of gut phages within each group at the order level.**

| Order          | CA     | HE     | OC     | GPCD   | GPYA   | GPQIN  | GPQIO  | GPXXL  | RP     |
|----------------|--------|--------|--------|--------|--------|--------|--------|--------|--------|
| Caudovirales   | 99.66% | 74.22% | 99.38% | 99.45% | 96.82% | 99.09% | 91.32% | 97.36% | 92.24% |
| Viruses_norank | 0.34%  | 25.72% | 0.61%  | 0.55%  | 3.18%  | 0.91%  | 8.58%  | 2.64%  | 7.76%  |
| Kalamavirales  | 0.00%  | 0.00%  | 0.00%  | 0.00%  | 0.00%  | 0.00%  | 0.09%  | 0.00%  | 0.00%  |
| Tubulavirales  | 0.00%  | 0.06%  | 0.01%  | 0.00%  | 0.00%  | 0.00%  | 0.00%  | 0.01%  | 0.00%  |

**Table S4 Information on the compositions and relative abundances of dominant gut phages within each group at the species level.**

[illegible]



**Figure S2 Co-occurrence network analysis of bacteria (A), and phage (B) communities in all groups.** The nodes representing taxonomic groups of bacterial and phage are color-coded based on phylum and family, respectively. The size of the node represents the number of connections (degree value). Different colored edges to represent positive (green) and negative (red) correlations between nodes. GPCD, captivity giant panda in Chengdu. GPYA, captivity giant panda in Ya'an. GPQIN, wild giant panda in Qinling. GPQIO, wild giant panda in Qionglai. GPXXL, wild giant panda in Xiaoxiangling. RP, wild red panda in Xiaoxiangling. CA, carnivorous mammal. OC, omnivorous mammal. HE, herbivorous mammal.

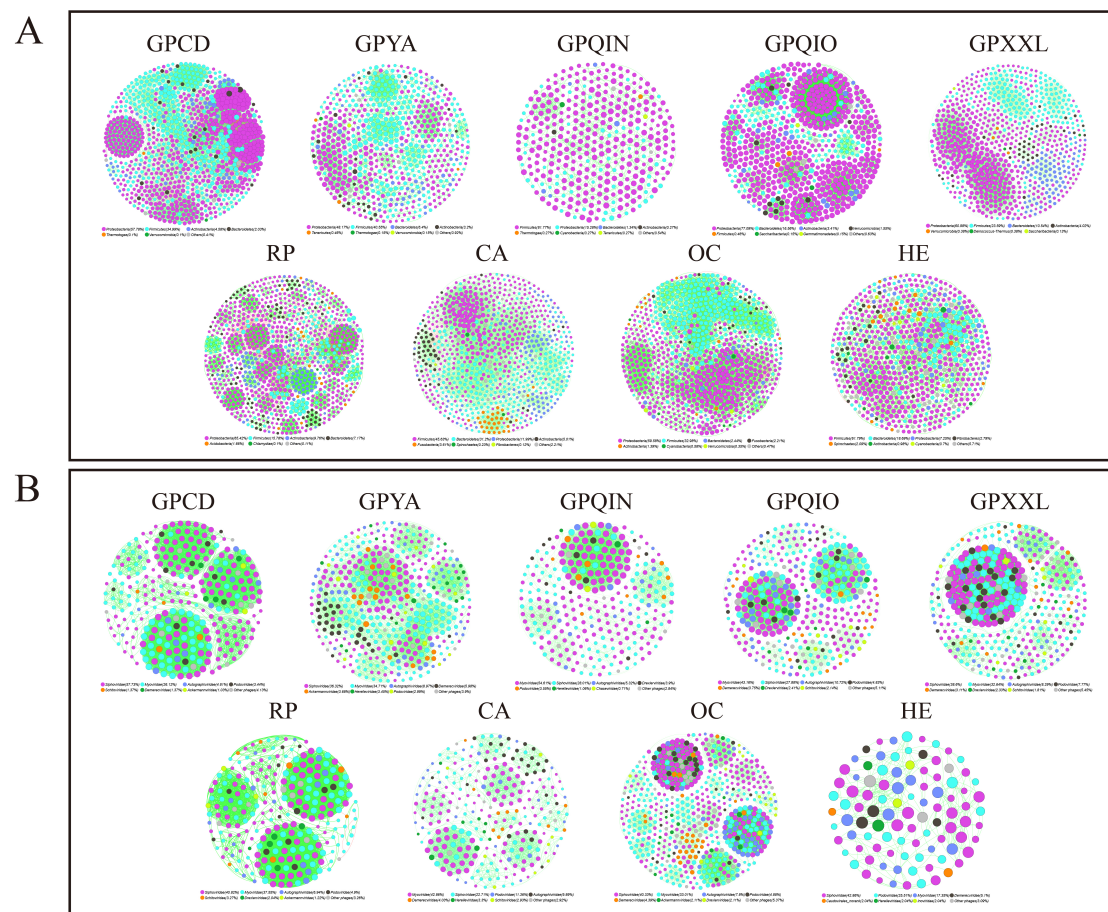



**Figure S3 Modular structure of co-occurring networks of bacterial (A), phage (B), and bacterial-phage communities in all groups.** The nodes affiliated with different modules were assigned distinct colors. The size of the node represents the number of connections (degree value). Different colored edges to represent positive (green) and negative (red) correlations between nodes. GPCD, captivity giant panda in Chengdu. GPYA, captivity giant panda in Ya'an. GPQIN, wild giant panda in Qinling. GPQIO, wild giant panda in Qionglai. GPXXL, wild giant panda in Xiaoxiangling. RP, wild red panda in Xiaoxiangling. CA, carnivorous mammal. OC, omnivorous mammal. HE, herbivorous mammal.

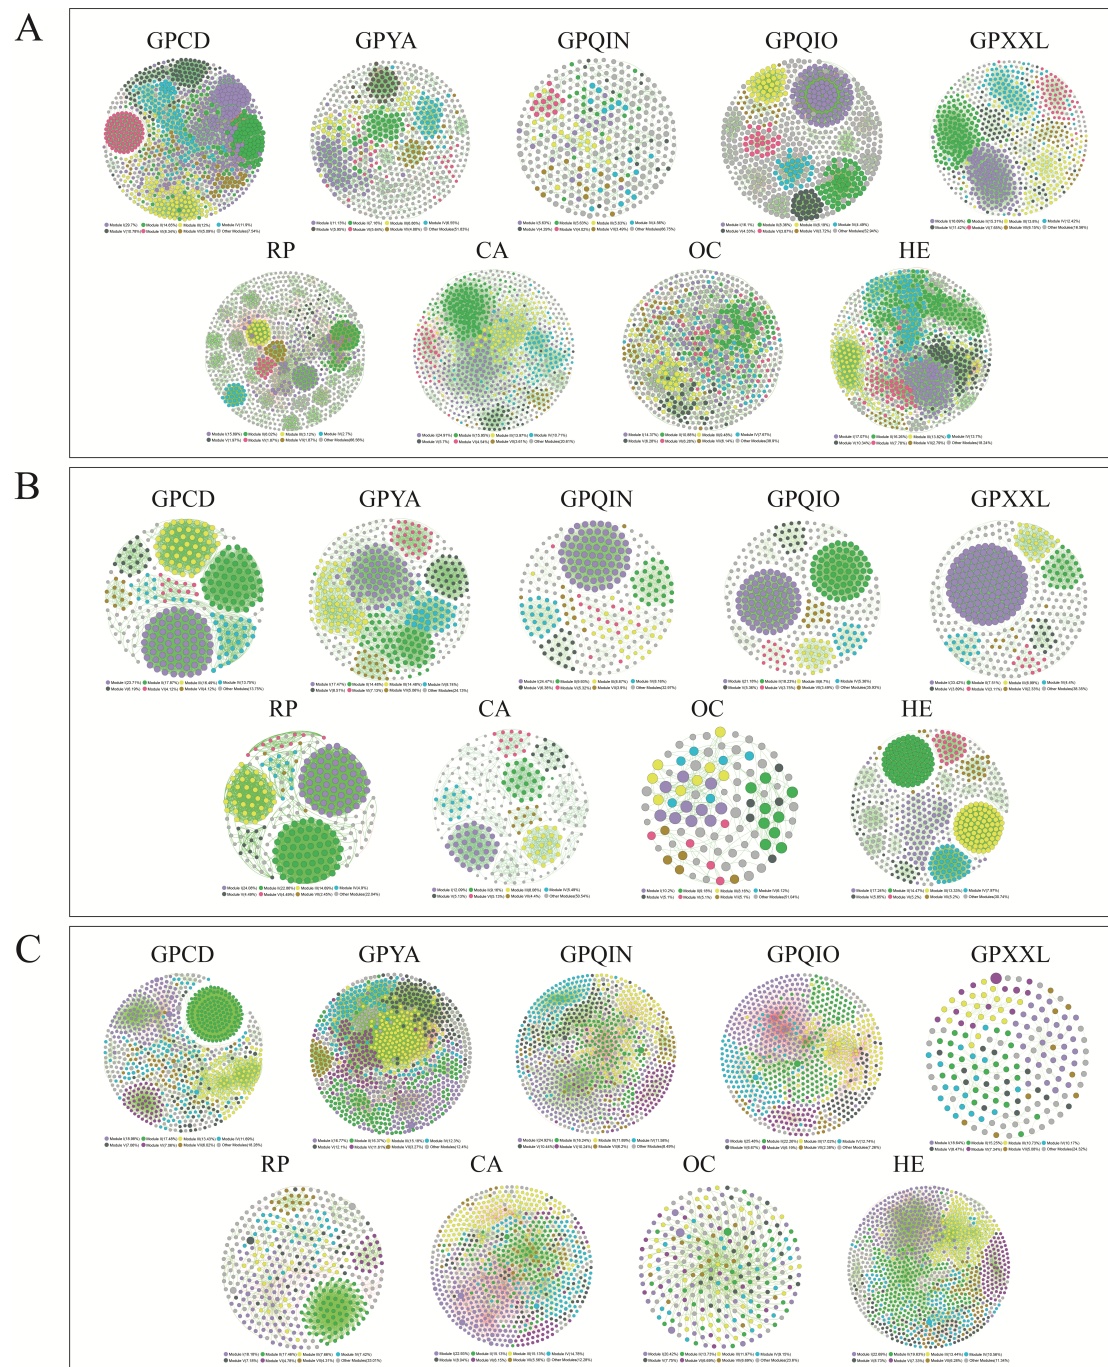

**Figure S4 Cohesion levels of gut bacteria, phage, and bacteria-phage communities was assessed across four different dietary preferences animal groups (carnivores, herbivores, omnivores, and bamboo-eating animals).** The positive cohesion in (A) bacteria, (D) phage, and (G) bacteria-phage networks. The negative cohesion in (B) bacteria, (E) phage, and (H) bacteria-phage networks. The total cohesion (the sum of the absolute values of the positive and negative cohesion values) in (C) bacteria, (F) phage, and (I) bacteria-phage networks. The significance levels were calculated by Kruskal-Wallis test. GPCD, captivity giant panda in Chengdu. GPYA, captivity giant panda in Ya'an. GPQIN, wild giant panda in Qinling. GPQIO, wild giant panda in Qionglai. GPXXL, wild giant panda in Xiaoxiangling. RP, wild red panda in Xiaoxiangling. CA, carnivorous mammal. OC, omnivorous mammal. HE, herbivorous mammal.

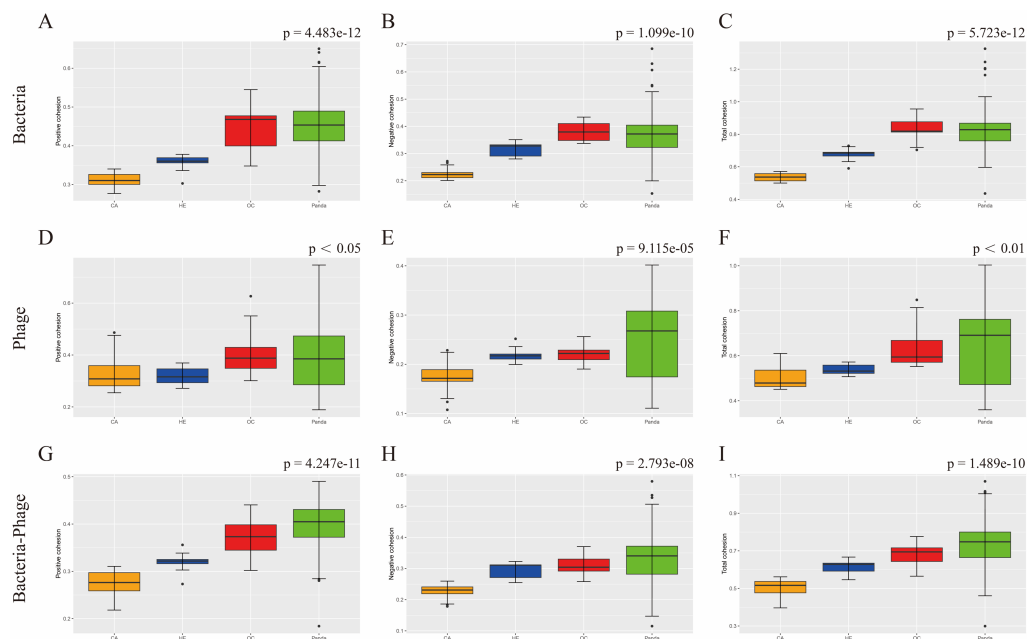

# Reference

- Guo, W., Mishra, S., Wang, C., Zhang, H., Ning, R., Kong, F., Zeng, B., Zhao, J., and Li, Y. (2019). Comparative Study of Gut Microbiota in Wild and Captive Giant Pandas (*Ailuropoda melanoleuca*). *Genes* 10.
- Wu, Q., Wang, X., Ding, Y., Hu, Y., Nie, Y., Wei, W., Ma, S., Yan, L., Zhu, L., and Wei, F. (2017). Seasonal variation in nutrient utilization shapes gut microbiome structure and function in wild giant pandas. *Proceedings of the Royal Society B: Biological Sciences* 284, 20170955.
- Zhang, W., Liu, W., Hou, R., Zhang, L., Schmitz-Esser, S., Sun, H., Xie, J., Zhang, Y., Wang, C., Li, L., *et al.* (2018). Age-associated microbiome shows the giant panda lives on hemicelluloses, not on cellulose. *The ISME journal* 12, 1319-1328.
- Zhu, L., Wu, Q., Deng, C., Zhang, M., Zhang, C., Chen, H., Lu, G., and Wei, F. (2018a). Adaptive evolution to a high purine and fat diet of carnivorans revealed by gut microbiomes and host genomes. *Environmental Microbiology* 20, 1711-1722.
- Zhu, L., Yang, Z., Yao, R., Xu, L., Chen, H., Gu, X., Wu, T., and Yang, X. (2018b). Potential Mechanism of Detoxification of Cyanide Compounds by Gut Microbiomes of Bamboo-Eating Pandas. *mSphere* 3, 10.1128/msphere.00229-00218.
